# Supplementary material for: Spin crossover in Hofmann-like coordination polymers. Effect of the axial ligand substituent and its position
Source: Royal Society of Chemistry journal article supplement (doi:10.1039/d3nj01498c), 2023-01-01
Supplement: d3nj01498c1.pdf [file d3nj01498c1.pdf]

Electronic Supplementary Information for “*Spin crossover in Hofmann-like coordination polymers. Effect of the axial ligand substituent and its position*” by Y. Avila, O. Pérez, L. Sánchez, M. C. Vázquez, R. Mojica, M. González, M. Ávila, J. Rodríguez-Hernández, E. Reguera

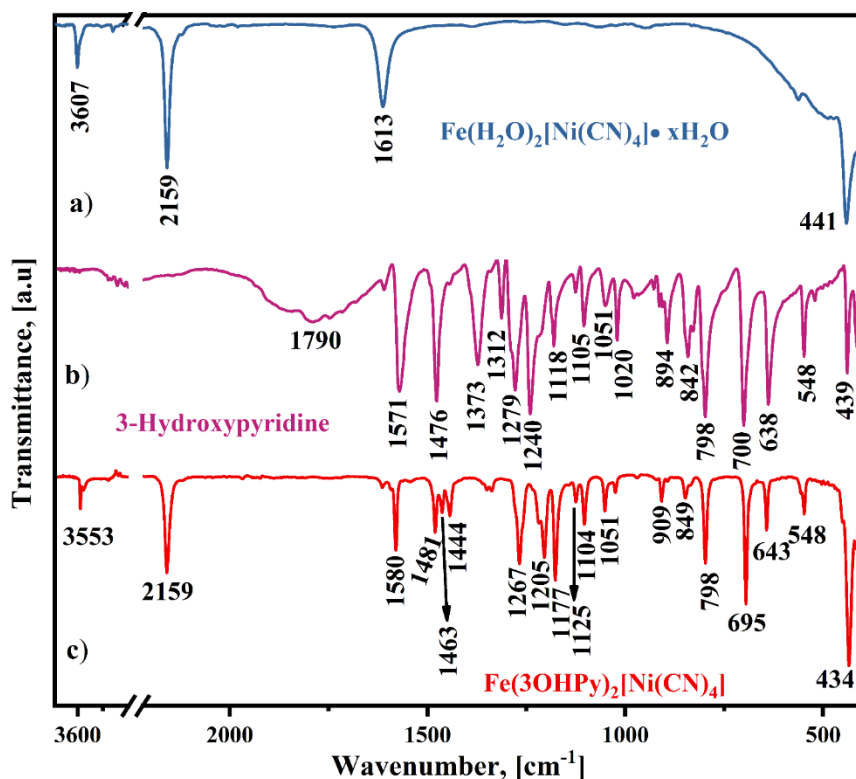

Figure S1. IR spectra for 2D ferrous tetracyanonickellate, 3-hydroxypyridine (3OHPy), and the solid obtained using the organic ligand as a pillar between adjacent layers, Fe(3OHPy)<sub>2</sub>[Ni(CN)<sub>4</sub>].

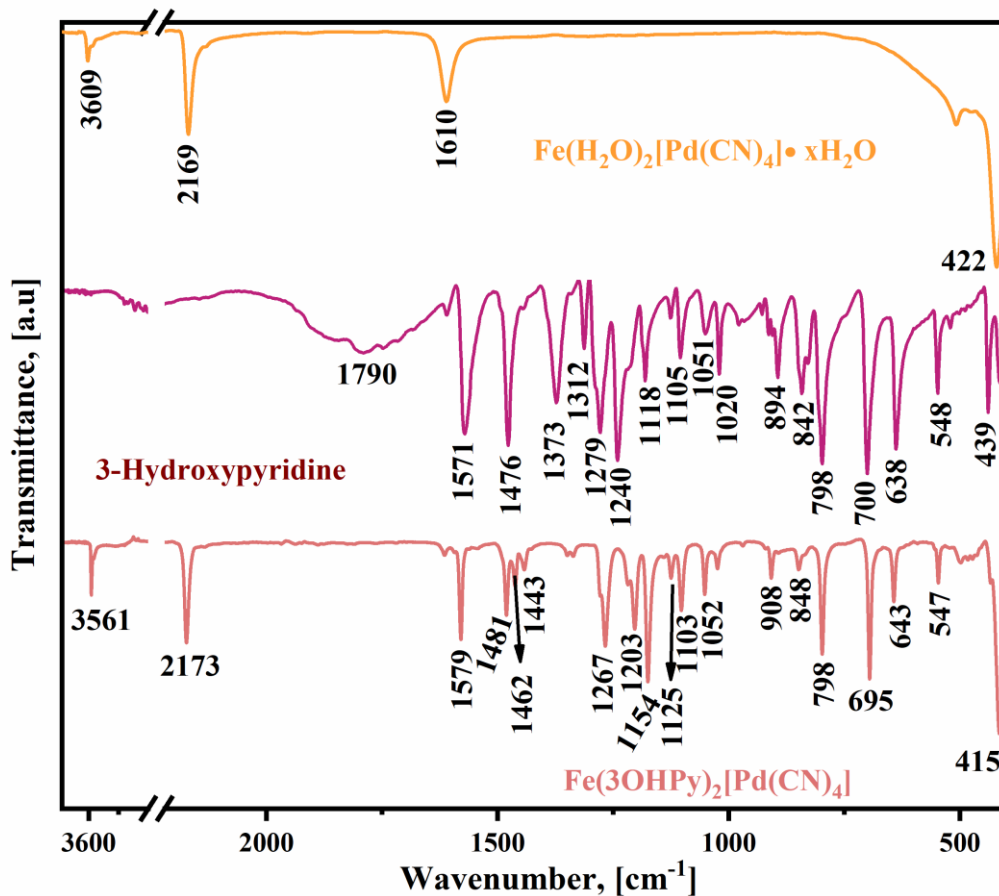

Figure S2. IR spectra for ferrous tetracyanopalladate, 3-hydroxypyridine, and the solid formed by the precipitation reaction of potassium tetracyanopalladate, ferrous ammonium sulfate, and the organic ligand.

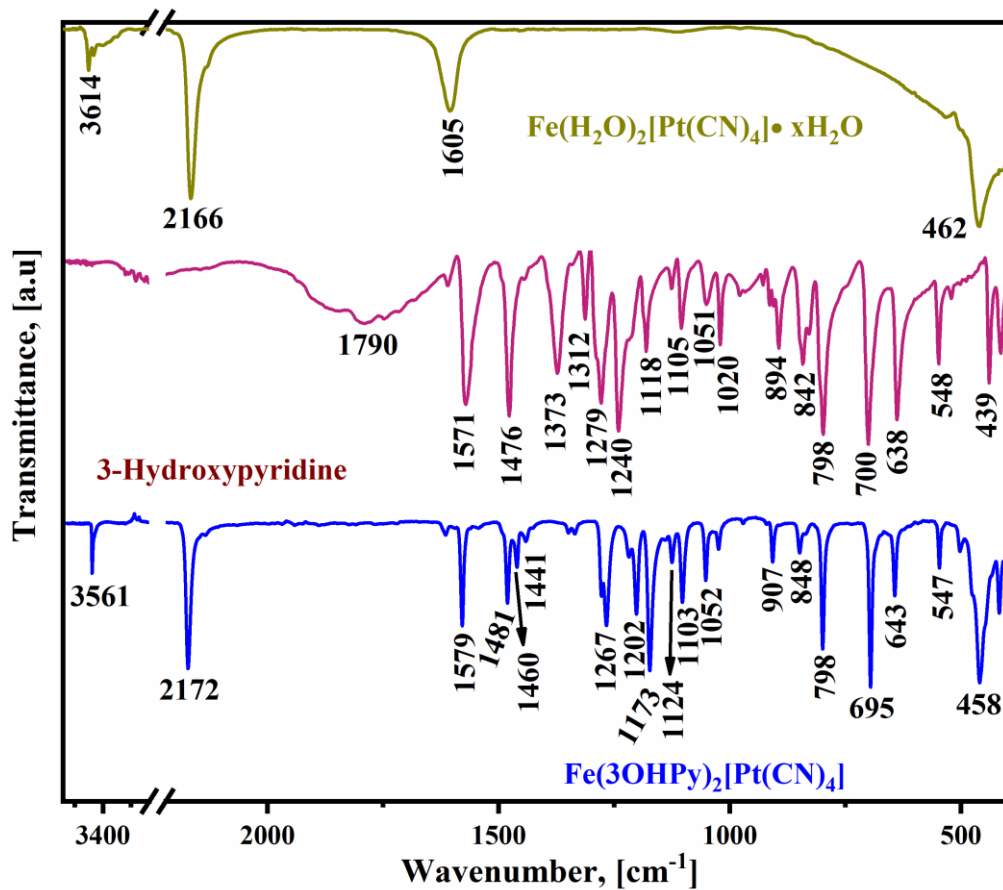

Figure S3. IR spectra for ferrous tetracyanoplatinate, 3-hydroxypyridine, and the solid formed by the precipitation reaction of potassium tetracyanoplatinate, ferrous ammonium sulfate, and the organic ligand.

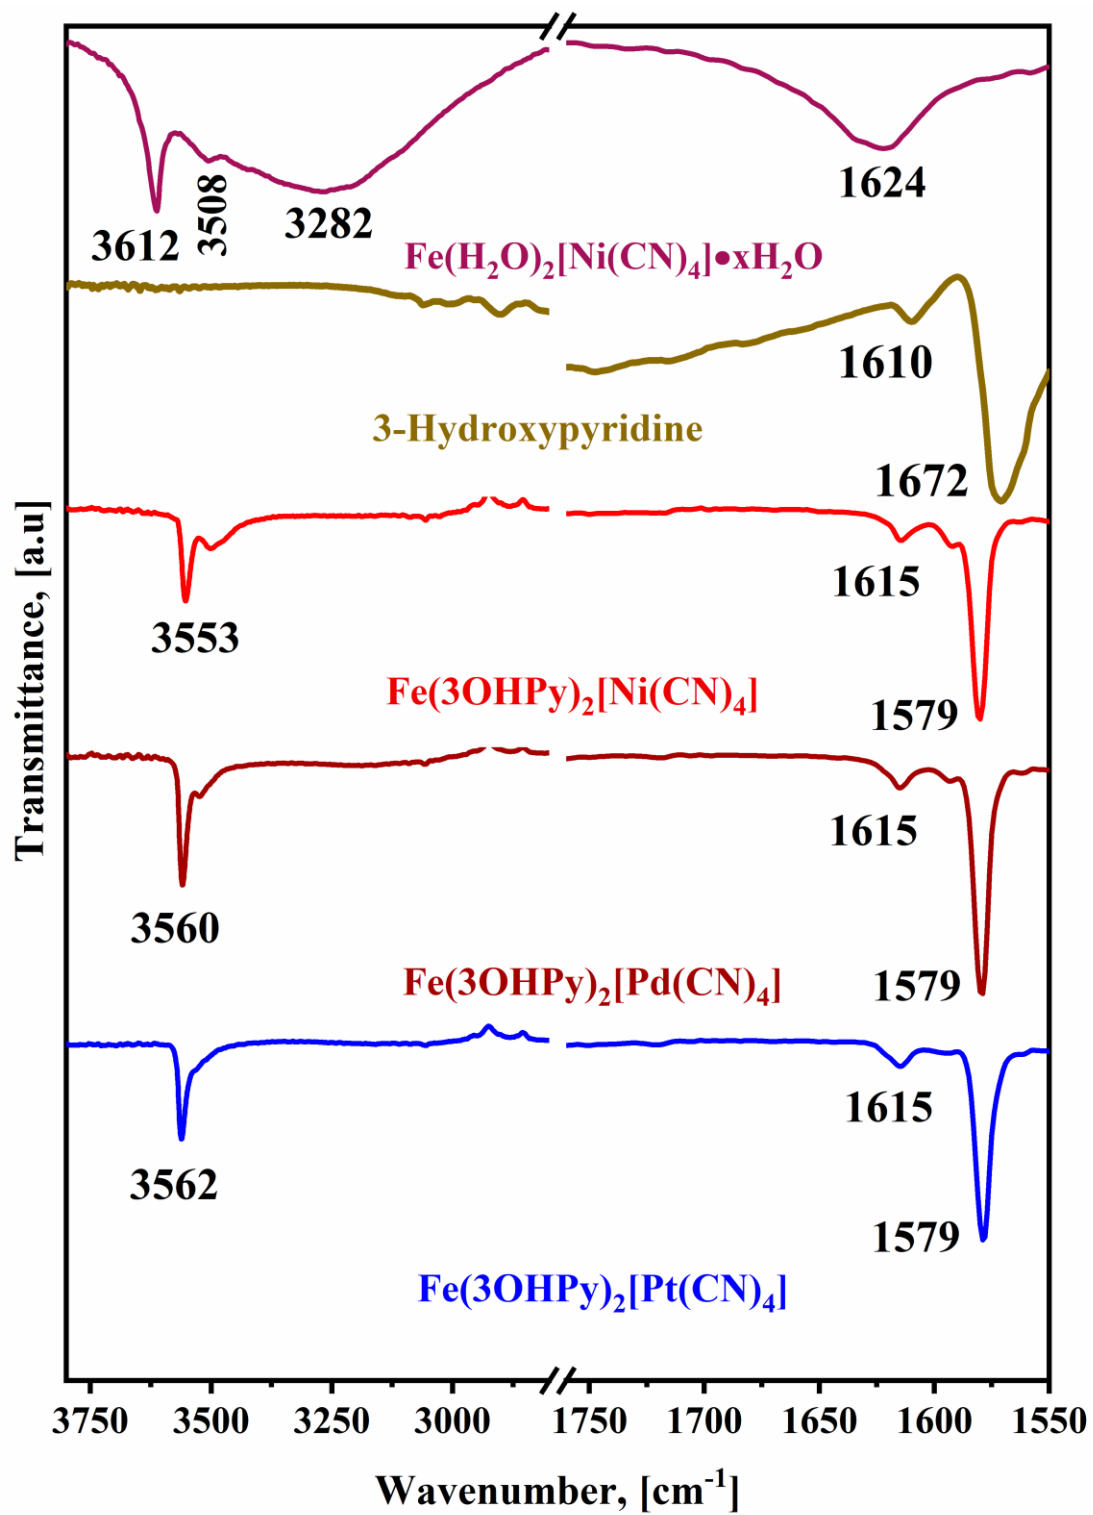

Figure S4.  $\nu(\text{OH})$  and  $\delta(\text{HOH})$  spectral region of  $\text{Fe}(\text{H}_2\text{O})_2[\text{Ni}(\text{CN})_4] \cdot n\text{H}_2\text{O}$ , 3-hydroxypyridine; and the  $\text{Fe}(\text{3OHPy})_2[\text{M}(\text{CN})_4]$  series with  $\text{M} = \text{Ni}, \text{Pd}, \text{Pt}$ . The  $\nu(\text{OH})$  and  $\delta(\text{HOH})$  absorption bands of  $\text{Fe}(\text{H}_2\text{O})_2[\text{Ni}(\text{CN})_4] \cdot 4\text{H}_2\text{O}$  are absent in the formed coordination polymers. In this hydrated, the presence of the coordinated water molecules is probed by the appearance of two narrow  $\nu(\text{OH})$  bands at 3612 and 3508  $\text{cm}^{-1}$ . The broad band at 3282  $\text{cm}^{-1}$  corresponds to hydrogen-bonded water molecules. In the  $\delta(\text{HOH})$  spectral region, these two types of water molecules produce an intense unresolved doublet at 1624  $\text{cm}^{-1}$ . That set of  $\nu(\text{OH})$  and  $\delta(\text{HOH})$  absorption bands are absent in the formed coordination polymers (Fig. S4, ESI). During the organic ligand coordination to the iron atom, the molecule's vibrational spectrum suffers significant changes, among them, the narrowing and shift to higher frequency values of their absorption bands (Fig. S1 to S3). The narrow absorption observed at 1615  $\text{cm}^{-1}$  was ascribed to these effects, and not the  $\delta(\text{HOH})$  vibration of water molecules. The band observed at 3560  $\text{cm}^{-1}$  was tentatively ascribed to a combination band of the organic ligand. The presence of a small fraction of water molecules in the formed hybrid solid cannot be discarded. These hybrid materials are obtained by a precipitation reaction using water as a solvent.

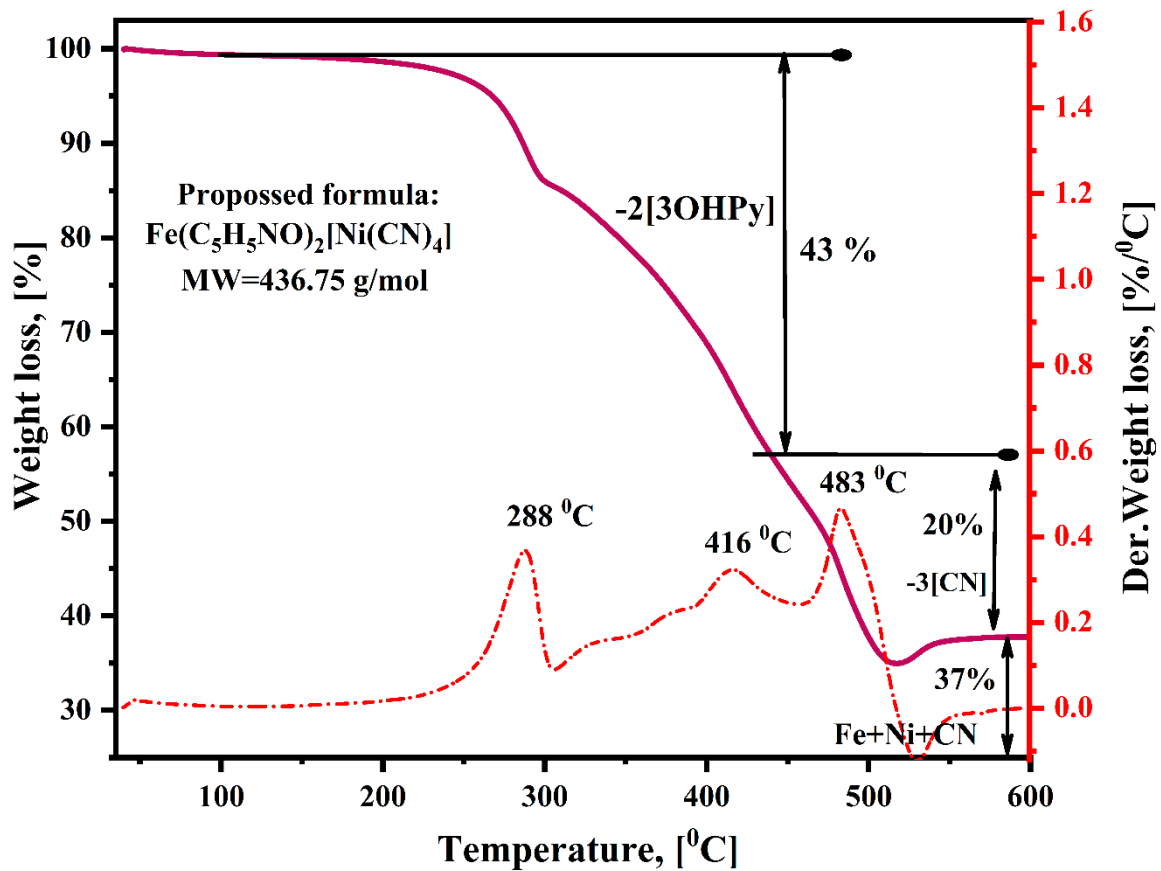

Figure S5. TG curve for the solid formed from the precipitation reaction of aqueous solutions of  $\text{K}_2[\text{Ni}(\text{CN})_4]$ , Mohr salt, and the organic ligand (3OHPy).

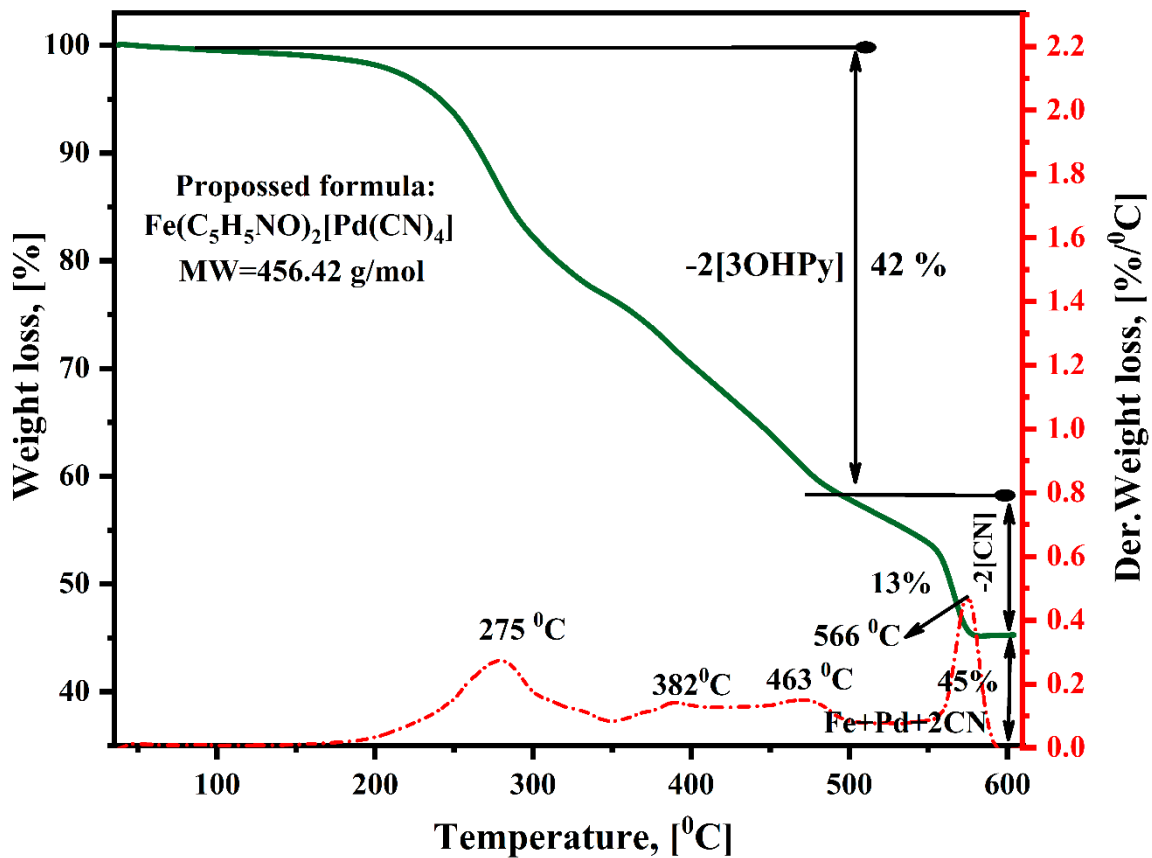

Figure S6. TG curve for the solid formed from the precipitation reaction of aqueous solutions of  $\text{K}_2[\text{Pd}(\text{CN})_4]$ , Mohr salt, and the organic ligand (3OHPy).

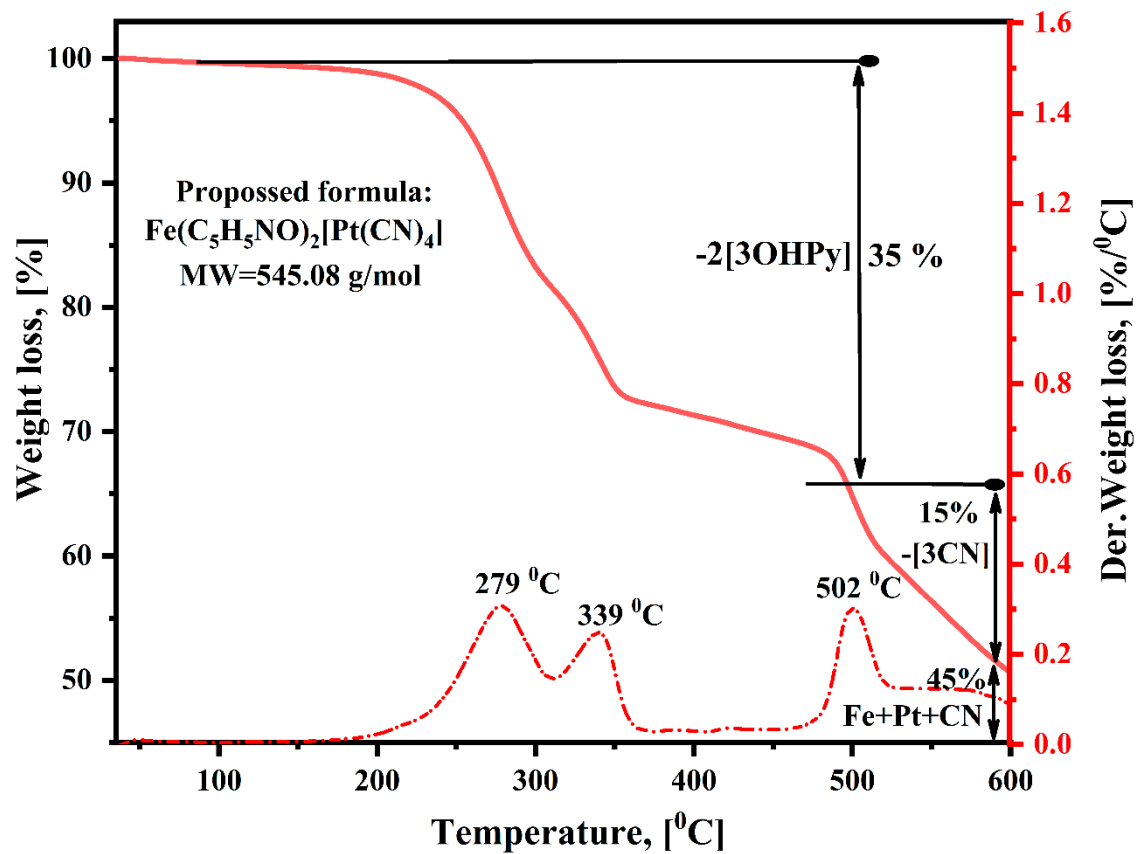

Figure S7. TG curve for the solid formed from the precipitation reaction of aqueous solutions of  $\text{K}_2[\text{Pt}(\text{CN})_4]$ , Mohr salt, and the organic ligand (3OHPy).



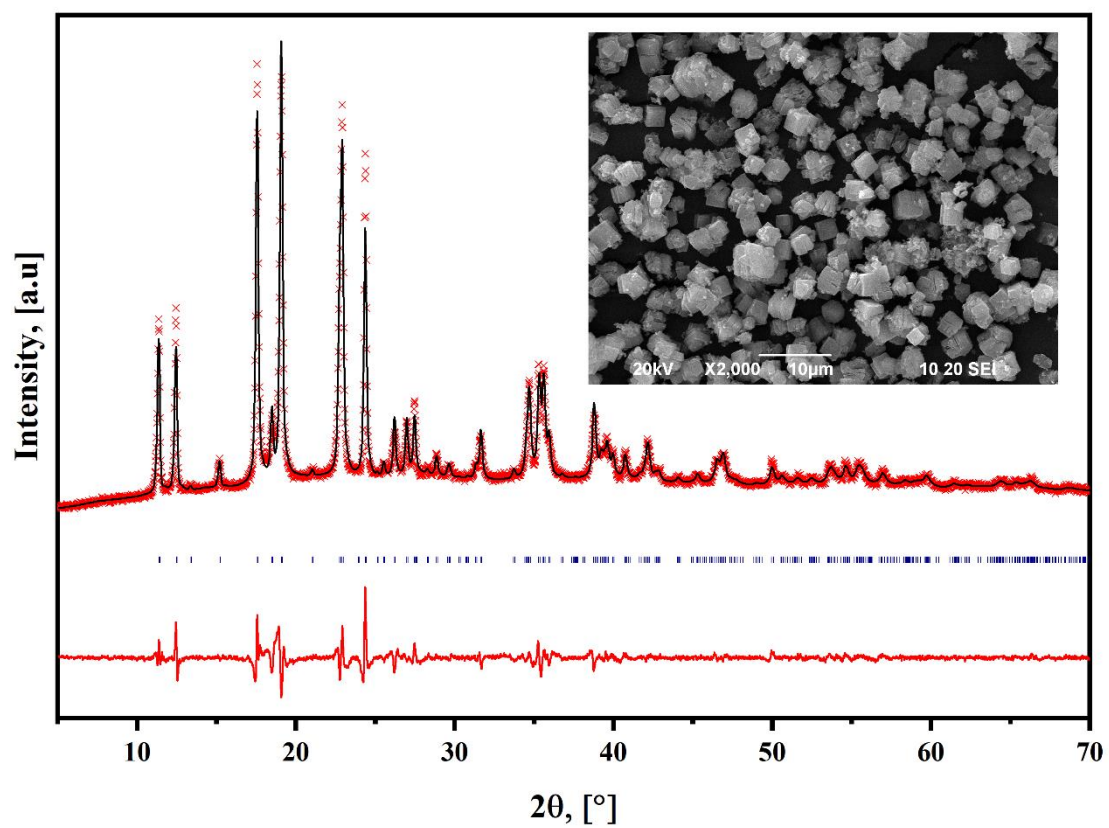

Figure S8. Experimental and fitted XRD powder patterns, and their difference for  $\text{Fe}(\text{3OHPy})_2[\text{Ni}(\text{CN})_4]$ . Inset: Morphology for the crystallites of the obtained solid.

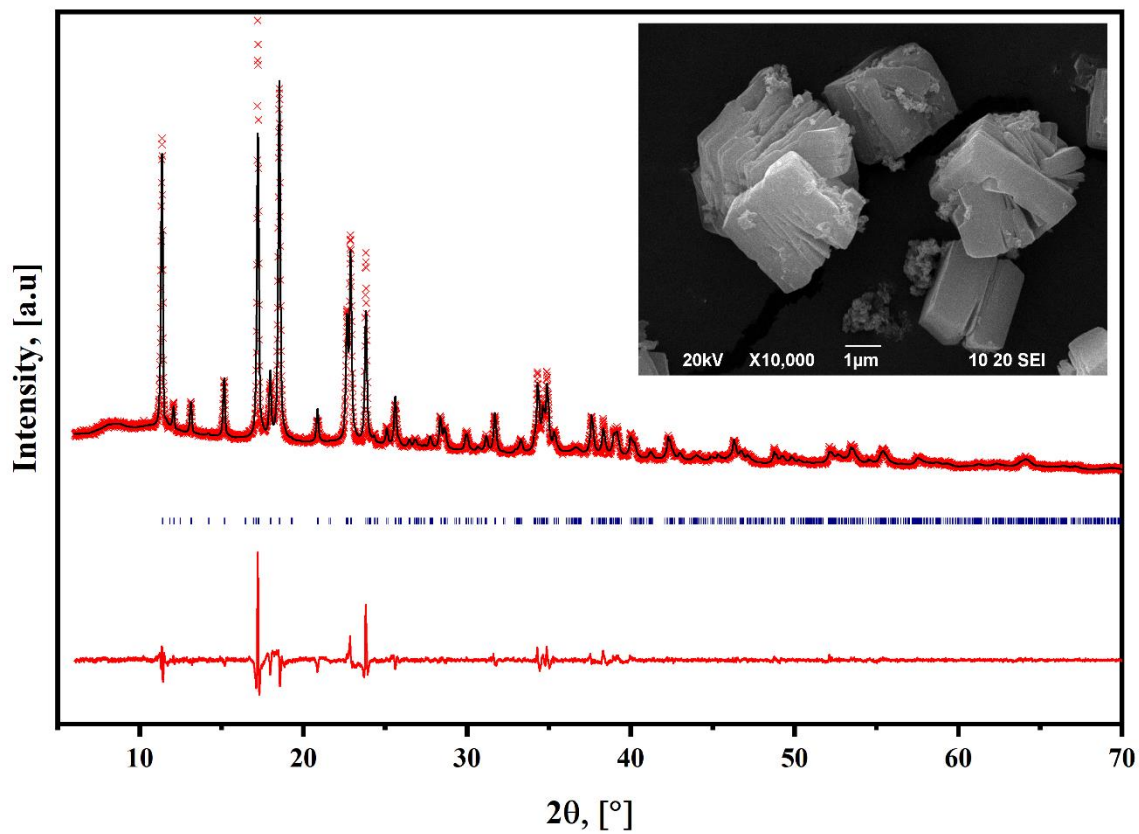

Figure S9. Experimental and fitted XRD powder patterns, and their difference for  $\text{Fe}(\text{3OHpy})_2[\text{Pd}(\text{CN})_4]$ . Inset: Morphology for the crystallites of the obtained solid.

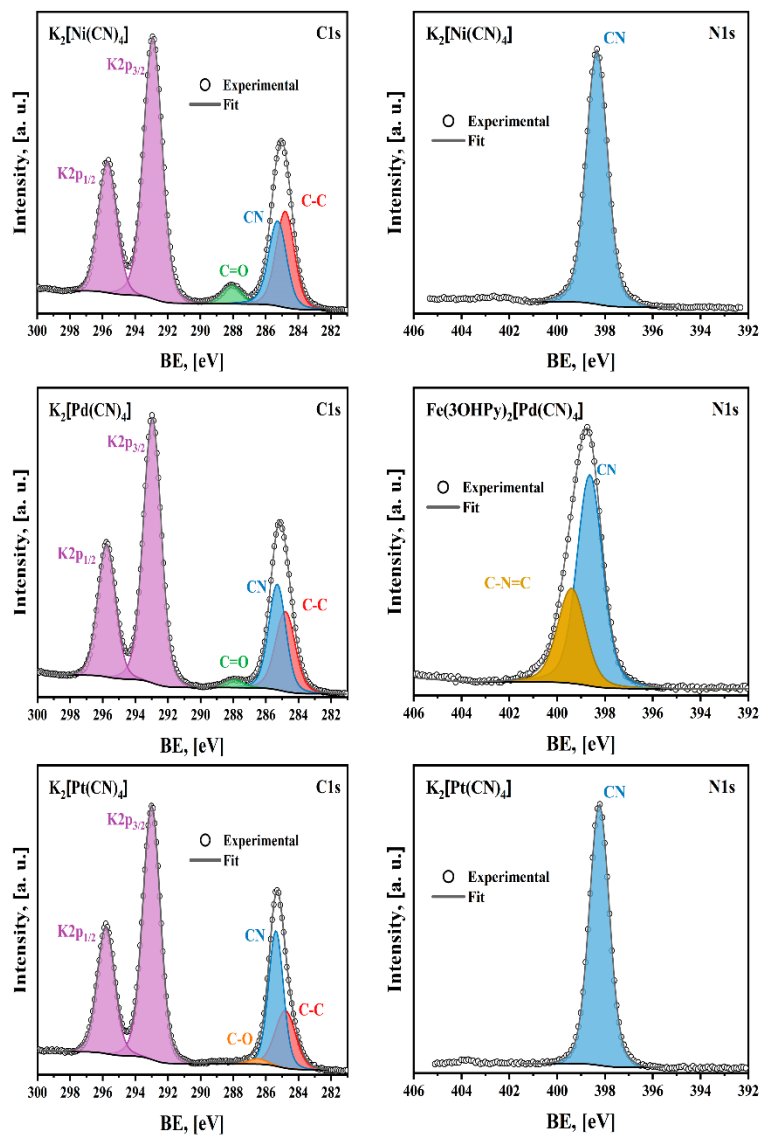

Figure S10. Experimental and fitted C1s and N1s spectral regions for the  $K_2[Ni(CN)_4]$ ,  $K_2[Pd(CN)_4]$  and  $K_2[Pt(CN)_4]$  salts.

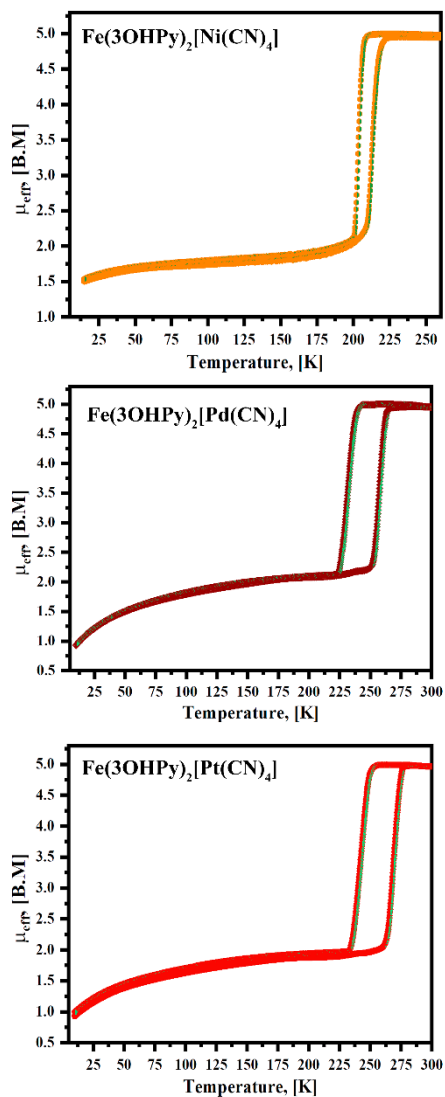

Figure S11.  $\mu_{\text{eff}}$  versus temperature curves for the entire temperature region explored through the magnetic measurements. Below 50 K a definite antiferromagnetic interaction is observed, ascribed to the fraction of iron atoms that remain in the HS state due to the mentioned kinetic effects.

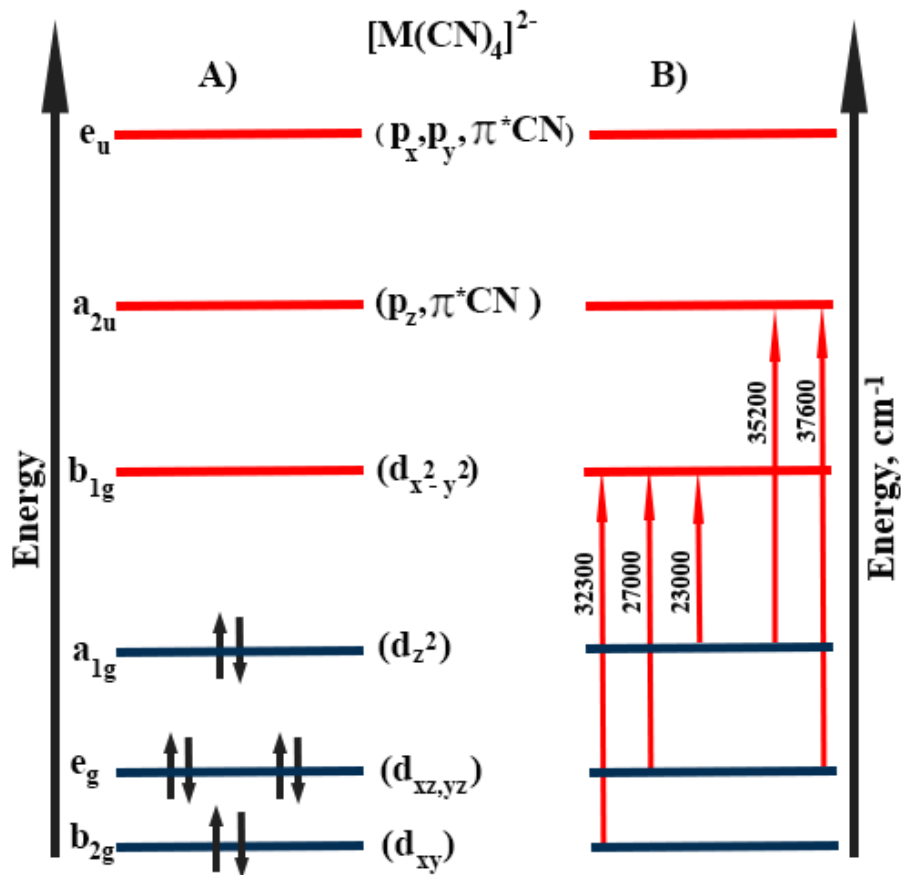

Figure S12. Energy diagram (d-d transitions) for the  $[M(CN)_4]^{2-}$  ion in the absence of relativistic effects. These d-d transitions in the 37600-23000  $cm^{-1}$  range correspond to absorption bands in the UV spectral region, from 266 to 435 nm.

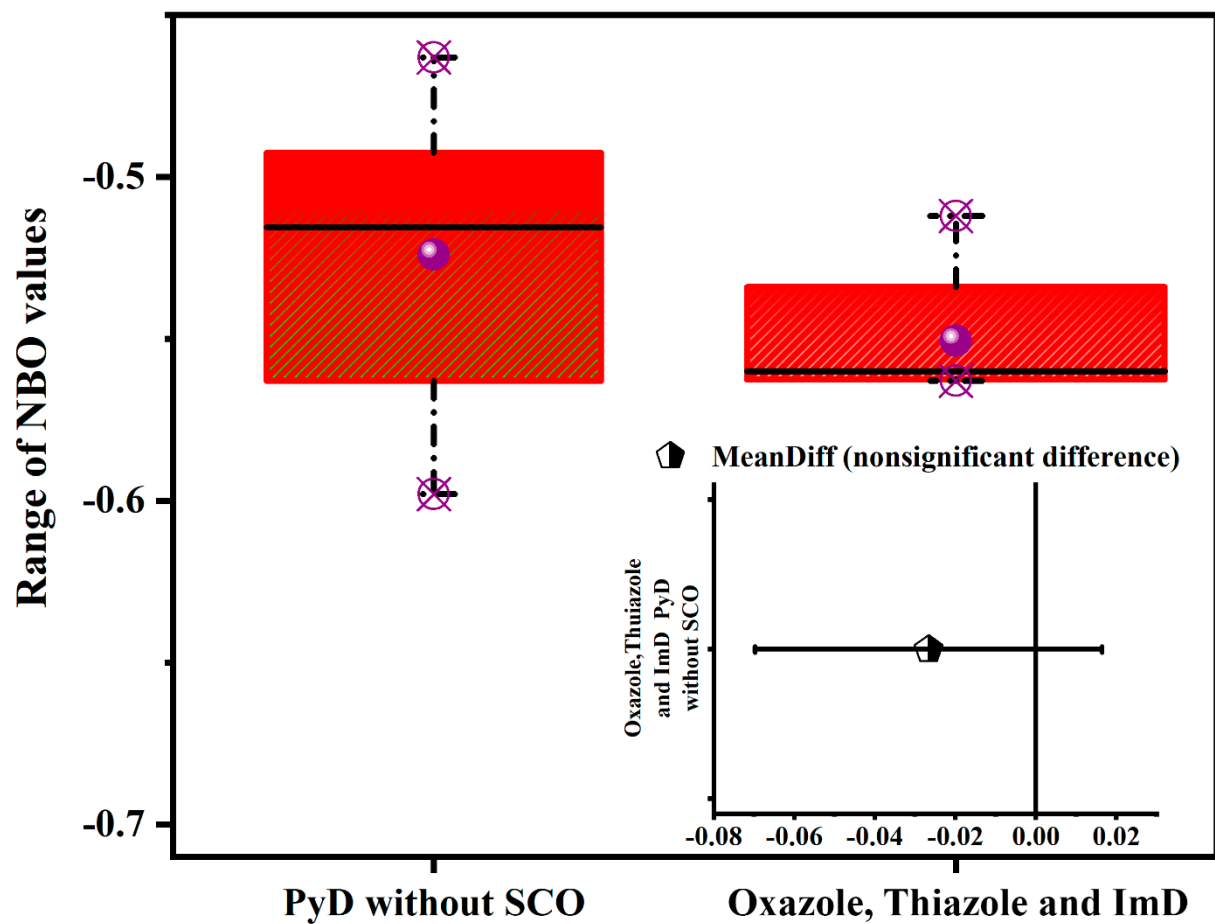

Figure S13. ANOVA test for the electron density (from NBO calculations) at the N-pyridinic atom in pyridine derivatives (PyD) forming Hofmann-like coordination polymers without SCO and oxazole, thiazole, and imidazole and its derivatives (ImD), including oxazole and thiazole, which form analogs solids.

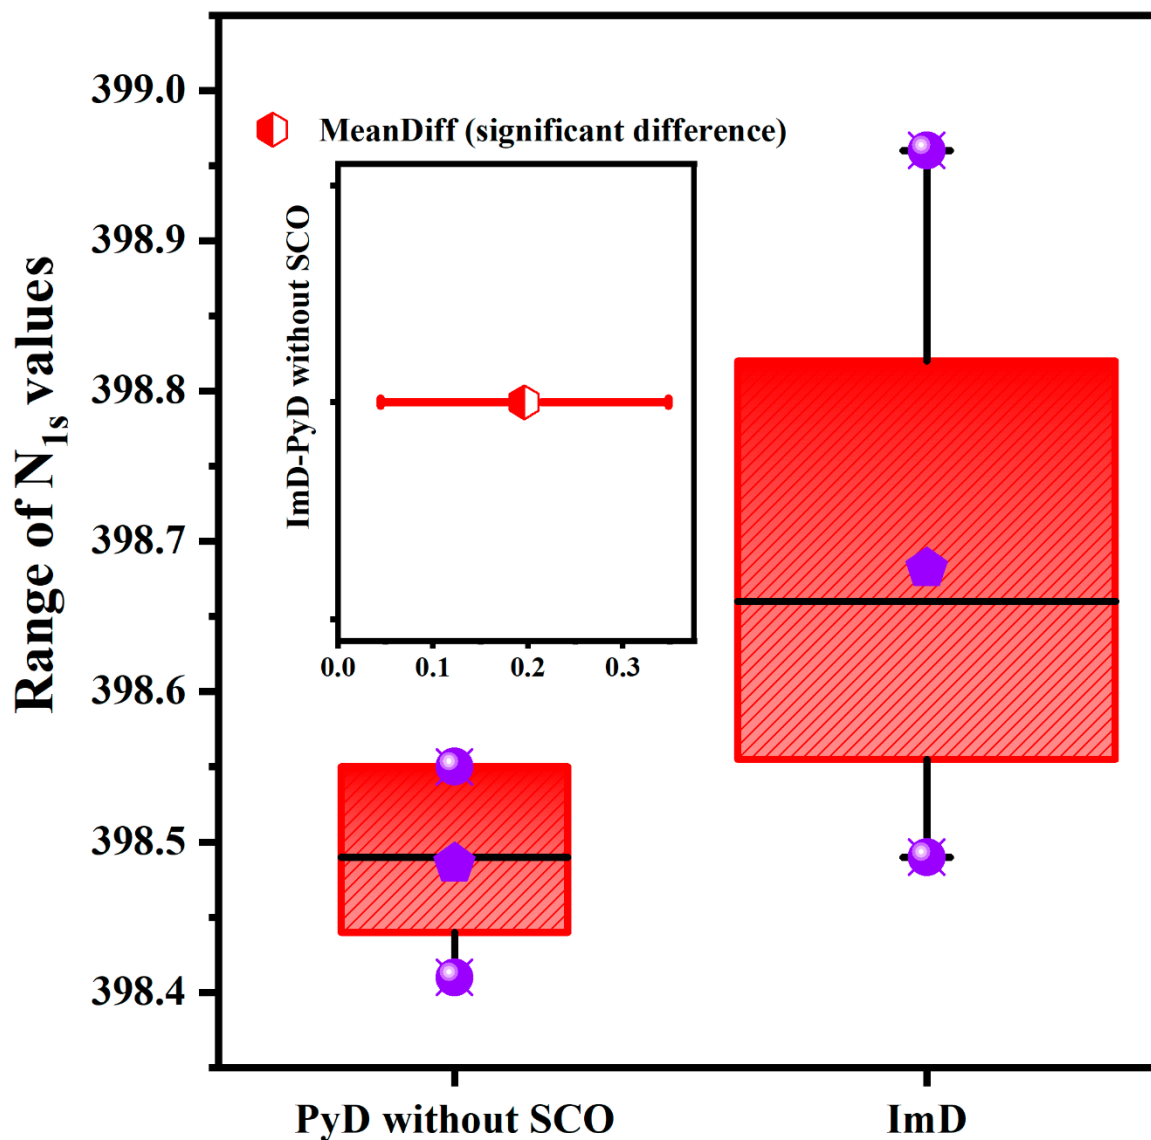

Figure S14. ANOVA analysis for the N<sub>1s</sub> values of Fe(L)<sub>2</sub>[M(CN)<sub>4</sub>], L= pyridine derivatives (PyD) without SCO and Fe(ImD)<sub>2</sub>[Ni(CN)<sub>4</sub>] Hofmann-like coordination polymers, ImD: imidazole and its derivatives, including thiazole and oxazole.

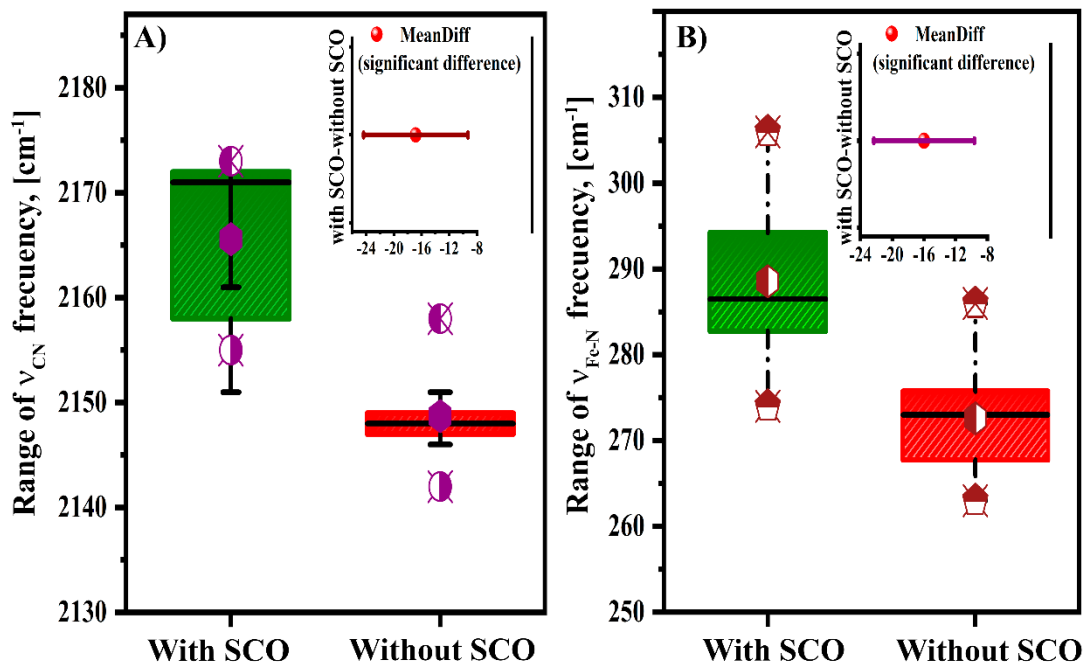

Figure S15. ANOVA analysis for the frequency values of the  $\nu(\text{CN})$  (Left) and  $\nu(\text{Fe-N}_L)$  (right) stretching vibrations in Hofmann-like solids with and without SCO on the sample cooling. The average frequency values and their dispersion for these two vibrations are significantly different in the considered two populations of samples.



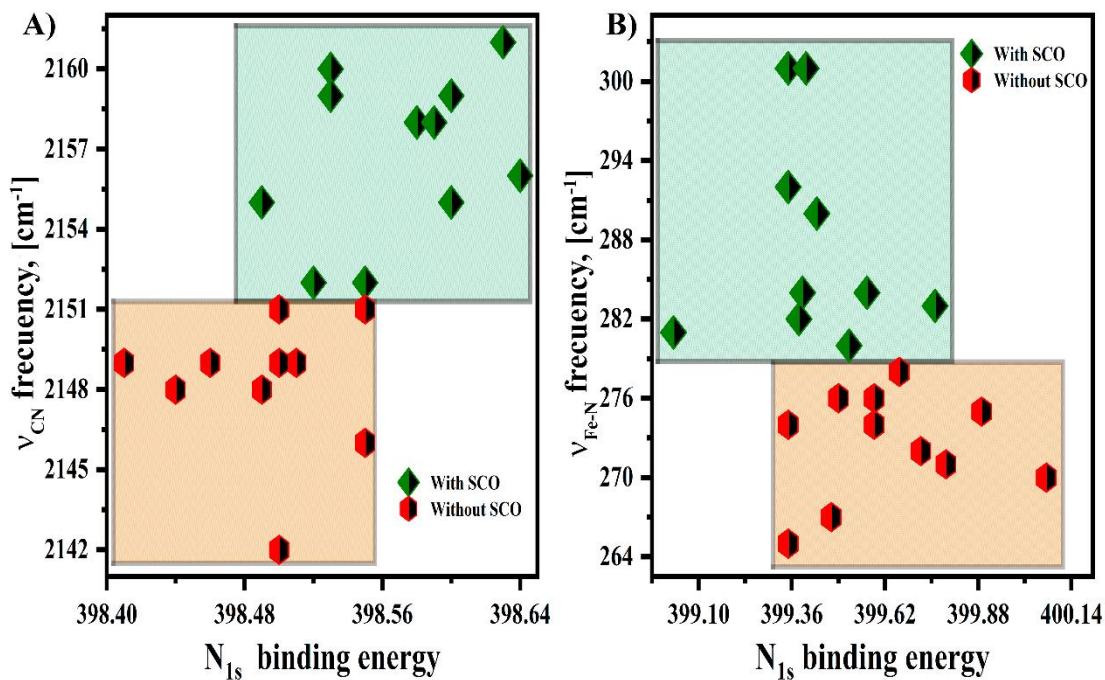

Figure S16. A) Plot of  $\nu(\text{CN})$  frequency versus  $N_{1s}$  BE for the CN ligand. B) Plot of  $\nu(\text{Fe-N}_L)$  frequency versus  $N_{1s}$  BE for the N-pyridinic atom in the organic ligand. These plots correspond to Hofmann-like solids,  $\text{Fe}(\text{L})_2[\text{M}(\text{CN})_4]$ , with and without SCO.

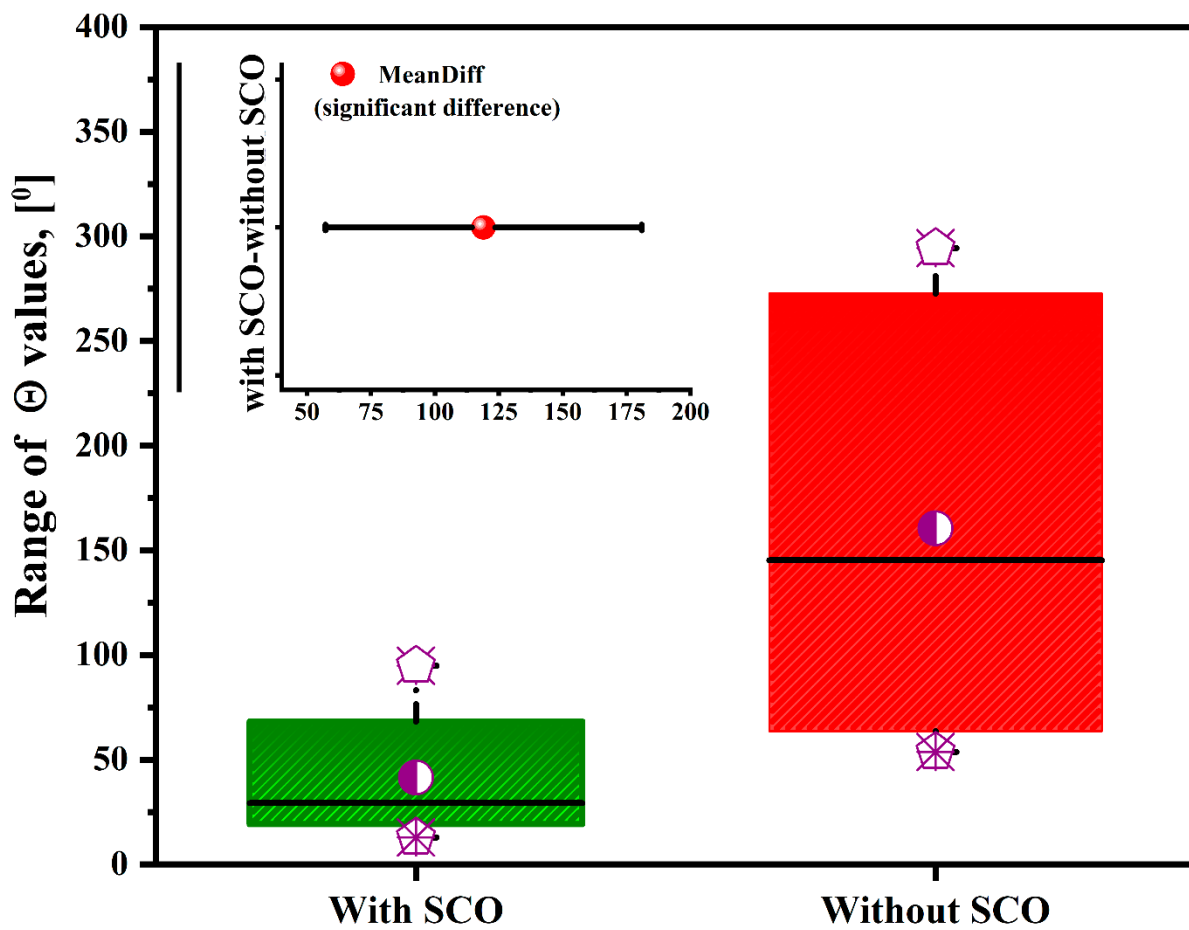

Figure S17. ANOVA analysis for the distortion index  $\theta$  of the iron atom coordination polyhedron in  $\text{Fe(L)}_2[\text{M(CN)}_4]$  Hofmann-like coordination polymers with and without SCO.

**MS1: Additional details on the XPS data processing.**

The recorded XPS spectra were compared with the ones obtained for the potassium salts to study the changes in electron density after the formation of the hybrid solids. For this reason, it is important to clarify that these comparisons were carried out through binding energies, and not through intensity. Regarding the relative peak area, it is important to note that the area under the curve of a photopeak in an XPS spectrum is related to the atomic concentration of each chemical species within the sample. In the compounds that were analyzed, their stoichiometry is known, which allows us to know the ratio between the populations of functional groups in the material. From this information, it is possible to establish the relationship of intensities of the different signals that make up the spectra fitting. However, it is important to consider that the C-C contribution is notably more intense due to the presence of adventitious contamination.

**MS2: Computational Method and software package used.**

Structure optimization for the high-temperature phases was performed with VASP (Viena Ab-Initio Simulation Package, version 5.4.4) software. DFT Spin-polarized calculations were carried out on the HS unit cell structure using the projected augmented-wave method (PAW) implemented in VASP. The general gradient approximated Perdew-Burke-Ernzerhof exchange-correlation density functional (GGA-PBE) was used considering its reported accuracy but above all for its efficiency in the prediction of the electronic structure and distance bonds. Spin-orbit coupling was incorporated to treat possible relativistic effects on the heavier atoms (Pd and Pt), likewise, scalar relativistic effects are included since the construction of PAW pseudopotentials. Van der Waals (vdW) dispersion corrections were incorporated according to the method of Grimme (DFT-D3), using the Becke-Jhonson damping function (BJ). The cutoff energy was optimized together with the k-points grid (Mokhorst-Pack) to 700 eV and  $6 \times 6 \times 4$ , respectively. Full structural relaxation considered all the lattice parameters and the atomic positions. The force convergence threshold was set to values less than  $0.02 \text{ eV}/\text{\AA}$  with an energy convergence value of  $1 \times 10^{-5} \text{ eV}$ .

NBO charges computations were performed with Gaussian 09 software package at m062x/aug-cc-tzvp level of theory for the molecular segments constituted by the Fe-L in the vacuum. The

computations were performed in two steps: structural optimization and single point energy (NBO) calculations.

For the analysis of variance (ANOVA) the procedure implemented in the Origin data processing package was used

Table S1. Details of data collection, crystal data, and structure refinement for Fe(3OHPy)<sub>2</sub>[M(CN)<sub>4</sub>] series with M = Ni, Pd and Pt at 300 K and 0K (calculated).

|                                                                | Fe(3OHPy) <sub>2</sub> [Pt(CN) <sub>4</sub> ] |         | Fe(3OHPy) <sub>2</sub> [Pd(CN) <sub>4</sub> ] |         | Fe(3OHPy) <sub>2</sub> [Ni(CN) <sub>4</sub> ] |         |
|----------------------------------------------------------------|-----------------------------------------------|---------|-----------------------------------------------|---------|-----------------------------------------------|---------|
| <b>Data collection</b>                                         |                                               |         |                                               |         |                                               |         |
| <b>Diffractometer</b>                                          | D8 Advance (from Bruker)                      |         |                                               |         |                                               |         |
| <b>Detector</b>                                                | lynx eye                                      |         |                                               |         |                                               |         |
| <b>Wavelength (Å)</b>                                          | CuK <sub>α</sub> : 1.54183                    |         |                                               |         |                                               |         |
| <b>2θ range (°)</b>                                            | 6.0-70.0                                      |         | 6.0-70.0                                      |         | 5.0-70.0                                      |         |
| <b>Step size (°)</b>                                           | 0.010591                                      |         | 0.010591                                      |         | 0.02044                                       |         |
| <b>Time per step (s)</b>                                       | 0.01                                          |         | 0.01                                          |         | 0.01                                          |         |
| <b>Unit cell</b>                                               |                                               |         |                                               |         |                                               |         |
| <b>Space Group</b>                                             | C2/m                                          |         | C2/m                                          |         | C2/m                                          |         |
| <b>Cell Parameters</b>                                         | a= 15.7130(7) Å                               |         | a= 15.7521(8) Å                               |         | a= 15.7988(2) Å                               |         |
|                                                                | b= 7.4629(4) Å                                |         | b= 7.4646(4) Å                                |         | b= 7.2962(5) Å                                |         |
|                                                                | c= 7.3933(4) Å                                |         | c= 7.4189(4) Å                                |         | c= 7.2162(5) Å                                |         |
|                                                                | β= 99.33(2)°                                  |         | β= 99.64(2)°                                  |         | β= 101.11(2)°                                 |         |
| <b>V(Å<sup>3</sup>)</b>                                        | 855.5(2)                                      |         | 860.0(2)                                      |         | 816.2(4)                                      |         |
| <b>Z</b>                                                       | 2                                             |         | 2                                             |         | 2                                             |         |
| <b>Refinement</b>                                              |                                               |         |                                               |         |                                               |         |
| <b># of reflections</b>                                        | 215                                           |         |                                               |         | 202                                           |         |
| <b># of refined parameters</b>                                 | Structural                                    | Profile | Structural                                    | Profile | Structural                                    | Profile |
|                                                                | 25                                            | 12      | 25                                            | 12      | 25                                            | 12      |
| <b>R<sub>exp</sub></b>                                         | 2.83                                          |         | 2.82                                          |         | 2.84                                          |         |
| <b>R<sub>wp</sub></b>                                          | 8.15                                          |         | 8.14                                          |         | 7.83                                          |         |
| <b>R<sub>B</sub></b>                                           | 6.07                                          |         | 5.72                                          |         | 5.49                                          |         |
| <b>S</b>                                                       | 2.87                                          |         | 2.88                                          |         | 2.75                                          |         |
| <b>Calculated unit cell parameters for the low spin phases</b> |                                               |         |                                               |         |                                               |         |
|                                                                | Fe(3OHPy) <sub>2</sub> [Pt(CN) <sub>4</sub> ] |         | Fe(3OHPy) <sub>2</sub> [Pd(CN) <sub>4</sub> ] |         | Fe(3OHPy) <sub>2</sub> [Ni(CN) <sub>4</sub> ] |         |
| <b>Space Group</b>                                             | C2/m                                          |         | C2/m                                          |         | C2/m                                          |         |
| <b>Cell Parameter</b>                                          | a= 15.1911 Å                                  |         | a= 15.6014 Å                                  |         | a= 15.2890 Å                                  |         |
|                                                                | b= 7.0974 Å                                   |         | b= 6.9847 Å                                   |         | b= 6.8928 Å                                   |         |
|                                                                | c= 7.3830 Å                                   |         | c= 7.4048 Å                                   |         | c= 7.1237 Å                                   |         |
|                                                                | β= 99.61°                                     |         | β= 98.38°                                     |         | β= 99.10 °                                    |         |
| <b>V(Å<sup>3</sup>)</b>                                        | 784.8                                         |         | 798.3                                         |         | 741.2                                         |         |
| <b>Z</b>                                                       | 2                                             |         | 2                                             |         | 2                                             |         |

Table S2. Results of elemental chemicals analysis for the  $\text{Fe}(\text{3OHPy})_2[\text{M}(\text{CN})_4]$  series with M = Ni, Pd, Pt.

| Metal | %Fe   |       | %M    |       | %C    |       | %N    |       | %O   |      | %H   |      |
|-------|-------|-------|-------|-------|-------|-------|-------|-------|------|------|------|------|
|       | Cal.  | Exp.  | Cal.  | Exp.  | Cal.  | Exp.  | Cal.  | Exp.  | Cal. | Exp. | Cal. | Exp. |
| Ni    | 13.66 | 13.97 | 14.36 | 14.89 | 41.14 | 42.04 | 20.56 | 21.01 | 7.83 | 7.81 | 2.44 | 2.35 |
| Pd    | 12.23 | 11.98 | 23.31 | 22.54 | 36.84 | 37.03 | 18.41 | 17.45 | 7.01 | 7.43 | 2.19 | 2.22 |
| Pt    | 10.24 | 10.01 | 35.78 | 35.07 | 30.85 | 30.02 | 15.42 | 15.10 | 5.87 | 5.54 | 1.83 | 1.56 |

Table S3. Refined atomic positions and thermal ( $B_{\text{iso}}$ ) and occupation ( $O_{\text{cc}}$ ) factors for the materials under study.

| Composition                                                            | site | x         | y         | z          | Biso    | Occ |
|------------------------------------------------------------------------|------|-----------|-----------|------------|---------|-----|
| <b><math>\text{Fe}(\text{3-OHPy})_2[\text{Pt}(\text{CN})_4]</math></b> |      |           |           |            |         |     |
| Pt                                                                     | 2c   | 0         | 0         | 0.5        | 1.97(2) | 1   |
| Fe                                                                     | 2b   | 0         | 0.5       | 0          | 2.06(2) | 1   |
| C1                                                                     | 8j   | 0.0100(3) | 0.1659(4) | 0.3036(4)  | 3.1(3)  | 1   |
| N1                                                                     | 8j   | 0.0054(3) | 0.2710(3) | 0.1953(3)  | 3.1(3)  | 1   |
| N2                                                                     | 4i   | 0.1389(2) | 0.5       | 0.0170(3)  | 3.1(3)  | 1   |
| C2                                                                     | 4i   | 0.1652(4) | 0.5       | -0.1459(5) | 3.1(3)  | 1   |
| C3                                                                     | 4i   | 0.2508(4) | 0.5       | -0.1704(3) | 3.1(3)  | 1   |
| C4                                                                     | 4i   | 0.3134(3) | 0.5       | -0.0180(2) | 3.1(3)  | 1   |
| C5                                                                     | 4i   | 0.2888(2) | 0.5       | 0.1519(4)  | 3.1(3)  | 1   |
| C6                                                                     | 4i   | 0.2015(4) | 0.5       | 0.1620(5)  | 3.1(3)  | 1   |
| O                                                                      | 4i   | 0.2729(3) | 0.5       | -0.3377(4) | 3.1(3)  | 1   |
| <b><math>\text{Fe}(\text{3-OHPy})_2[\text{Pd}(\text{CN})_4]</math></b> |      |           |           |            |         |     |
| Pd                                                                     | 2c   | 0         | 0         | 0.5        | 2.04(2) | 1   |
| Fe                                                                     | 2b   | 0         | 0.5       | 0          | 2.15(2) | 1   |
| C1                                                                     | 8j   | 0.0120(8) | 0.1657(8) | 0.3039(6)  | 3.3(3)  | 1   |
| N1                                                                     | 8j   | 0.0057(7) | 0.2713(6) | 0.1958(5)  | 3.3(3)  | 1   |
| N2                                                                     | 4i   | 0.1384(9) | 0.5       | 0.0175(7)  | 3.3(3)  | 1   |
| C2                                                                     | 4i   | 0.1653(6) | 0.5       | -0.1460(6) | 3.3(3)  | 1   |
| C3                                                                     | 4i   | 0.2509(4) | 0.5       | -0.1703(5) | 3.3(3)  | 1   |
| C4                                                                     | 4i   | 0.3138(6) | 0.5       | -0.0177(5) | 3.3(3)  | 1   |
| C5                                                                     | 4i   | 0.2882(4) | 0.5       | 0.1512(7)  | 3.3(3)  | 1   |
| C6                                                                     | 4i   | 0.2013(7) | 0.5       | 0.1622(6)  | 3.3(3)  | 1   |
| O                                                                      | 4i   | 0.2730(6) | 0.5       | -0.3376(5) | 3.3(3)  | 1   |
| <b><math>\text{Fe}(\text{3-OHPy})_2[\text{Ni}(\text{CN})_4]</math></b> |      |           |           |            |         |     |
| Ni                                                                     | 2c   | 0         | 0         | 0.5        | 2.06(2) | 1   |
| Fe                                                                     | 2b   | 0         | 0.5       | 0          | 2.23(2) | 1   |
| C1                                                                     | 8j   | 0.0102(5) | 0.1690(5) | 0.2999(5)  | 3.4(3)  | 1   |
| N1                                                                     | 8j   | 0.0052(4) | 0.2749(4) | 0.1913(4)  | 3.4(3)  | 1   |
| N2                                                                     | 4i   | 0.1389(6) | 0.5       | 0.0170(4)  | 3.4(3)  | 1   |
| C2                                                                     | 4i   | 0.1652(5) | 0.5       | -0.1459(6) | 3.4(3)  | 1   |
| C3                                                                     | 4i   | 0.2508(6) | 0.5       | -0.1704(4) | 3.4(3)  | 1   |
| C4                                                                     | 4i   | 0.3134(6) | 0.5       | -0.0180(5) | 3.4(3)  | 1   |
| C5                                                                     | 4i   | 0.2888(5) | 0.5       | 0.1519(6)  | 3.4(3)  | 1   |
| C6                                                                     | 4i   | 0.2015(5) | 0.5       | 0.1620(6)  | 3.4(3)  | 1   |

|   |    |           |     |            |        |   |
|---|----|-----------|-----|------------|--------|---|
| o | 4i | 0.2729(4) | 0.5 | -0.3377(5) | 3.4(3) | 1 |
|---|----|-----------|-----|------------|--------|---|

Table S4. Calculated inter-atomic distances (in Å) and bond angles (in °), from the refined crystal structures, for the materials under study.

| Bond distance (Å)                                 | Angles (°)            |                      |
|---------------------------------------------------|-----------------------|----------------------|
| <b>Fe(3OHPy)<sub>2</sub>[Pt(CN)<sub>4</sub>]</b>  |                       |                      |
| Fe-N1 = 2.230(2)                                  | N1-Fe-N2 = 91.73(2)   | Fe-N2-C2 = 113.83(3) |
| Fe-N2 = 2.166(1)                                  | N1-Fe-N2 = 88.27(2)   | N2-C2-C3 = 124.52(4) |
| Pt-C1 = 1.934(2)                                  | N1-Fe-N1 = 79.94(3)   | C2-C3-C4 = 118.36(4) |
| C1-N1 = 1.115(1)                                  | N1-Fe-N1 = 100.06(3)  | C3-C4-C5 = 118.77(6) |
| N2-C2 = 1.335(2)                                  | N2-Fe-N2 = 180.0      | C4-C5-C6 = 118.51(4) |
| C2-C3 = 1.386(1)                                  | C1-Pt-C1 = 79.61(3)   | C5-C6-N2 = 124.39(4) |
| C3-C4 = 1.370(1)                                  | C1-Pt-C1 = 100.39(4)  | C6-N2-Fe = 130.72(3) |
| C4-C5 = 1.373(2)                                  | N1-C1-Pt = 170.407(6) | C6-N2-C2 = 115.45(6) |
| C5-C6 = 1.386(1)                                  | C1-N1-Fe = 174.547(5) | C2-C3-O = 121.58(4)  |
| C6-N2 = 1.332(1)                                  |                       | C4-C3-O = 120.06(6)  |
| C3-O = 1.338(2)                                   |                       |                      |
| <b>Fe(3OHPy)<sub>2</sub>[Pd(CN)<sub>4</sub>]</b>  |                       |                      |
| Fe-N1 = 2.234(2)                                  | N1-Fe-N2 = 91.76(2)   | Fe-N2-C2 = 114.27(3) |
| Fe-N2 = 2.162(1)                                  | N1-Fe-N2 = 88.24(2)   | N2-C2-C3 = 125.01(4) |
| Pd-C1 = 1.943(2)                                  | N1-Fe-N1 = 80.31(3)   | C2-C3-C4 = 118.33(4) |
| C1-N1 = 1.117(1)                                  | N1-Fe-N1 = 99.69(3)   | C3-C4-C5 = 117.93(6) |
| N2-C2 = 1.350(2)                                  | N2-Fe-N2 = 180.0      | C4-C5-C6 = 119.73(4) |
| C2-C3 = 1.390(1)                                  | C1-Pd-C1 = 79.09(3)   | C5-C6-N2 = 124.13(4) |
| C3-C4 = 1.374(1)                                  | C1-Pd-C1 = 100.91(4)  | C6-N2-Fe = 130.86(3) |
| C4-C5 = 1.379(2)                                  | N1-C1-Pd = 168.20(5)  | C6-N2-C2 = 114.87(6) |
| C5-C6 = 1.385(1)                                  | C1-N1-Fe = 174.48(5)  | C2-C3-O = 121.78(4)  |
| C6-N2 = 1.333(1)                                  |                       | C4-C3-O = 119.89(6)  |
| C3-O = 1.344(2)                                   |                       |                      |
| <b>Fe(3-OHPy)<sub>2</sub>[Ni(CN)<sub>4</sub>]</b> |                       |                      |
| Fe-N1 = 2.137(2)                                  | N1-Fe-N2 = 92.91(2)   | Fe-N2-C2 = 115.92(3) |
| Fe-N2 = 2.174(1)                                  | N1-Fe-N2 = 87.09(2)   | N2-C2-C3 = 126.23(4) |
| Ni-C1 = 1.929(2)                                  | N1-Fe-N1 = 79.54(3)   | C2-C3-C4 = 118.63(4) |
| C1-N1 = 1.092(1)                                  | N1-Fe-N1 = 100.46(3)  | C3-C4-C5 = 116.79(6) |
| N2-C2 = 1.320(2)                                  | N2-Fe-N2 = 180.0      | C4-C5-C6 = 120.38(4) |
| C2-C3 = 1.397(1)                                  | C1-Ni-C1 = 79.47(3)   | C5-C6-N2 = 124.55(4) |
| C3-C4 = 1.330(1)                                  | C1-Ni-C1 = 100.53(4)  | C6-N2-Fe = 130.66(3) |
| C4-C5 = 1.356(2)                                  | N1-C1-Ni = 169.77(6)  | C6-N2-C2 = 113.42(6) |
| C5-C6 = 1.395(1)                                  | C1-N1-Fe = 174.54(5)  | C2-C3-O = 123.28(4)  |
| C6-N2 = 1.294(1)                                  |                       | C4-C3-O = 118.09(6)  |
| C3-O = 1.320(2)                                   |                       |                      |

Table S5. Details of the crystal data for six Hofmann-like coordination polymers without spin crossover. These six compositions were prepared and their crystal structure solved and refined.

| M                                                                                                     | Ligand      | SG                | Cell parameters                                         | Cell volume              | Ref. (CCDC)* |
|-------------------------------------------------------------------------------------------------------|-------------|-------------------|---------------------------------------------------------|--------------------------|--------------|
| 4-Ethynylpyridine (Ni)<br>Fe(C <sub>7</sub> N) <sub>2</sub> [Ni(CN) <sub>4</sub> ]                    | 4EPy        | I2/m              | a=18.3802 Å<br>b=7.4668 Å<br>c=6.8675 Å<br>β=96.0170°   | V=937.31 Å <sup>3</sup>  | 2251855      |
| 4-Iodopyridine (Ni)<br>Fe(C <sub>5</sub> NI) <sub>2</sub> [Ni(CN) <sub>4</sub> ]                      | 4IPy        | I2/m              | a=18.3630 Å<br>b=7.4646 Å<br>c=6.7483 Å<br>β=95.2197°   | V=921.17 Å <sup>3</sup>  | 2251856      |
| 4-Hydroxypyridine (Ni)<br>Fe(C <sub>5</sub> NO) <sub>2</sub> [Ni(CN) <sub>4</sub> ]                   | 4OHPy       | P2 <sub>1</sub>   | a=10.3432 Å<br>b=10.2877 Å<br>c=7.7411 Å<br>β=101.8650° | V=806.11 Å <sup>3</sup>  | 2251857      |
| 5-Ethynylpyrimidine (Ni)<br>Fe(C <sub>6</sub> N <sub>2</sub> ) <sub>2</sub> [Ni(CN) <sub>4</sub> ]    | 5EPym       | P2 <sub>1</sub>   | a=16.3432 Å<br>b=6.9451 Å<br>c=7.6366 Å<br>β=91.5604°   | V=866.47 Å <sup>3</sup>  | 2251858      |
| Ethyl Nicotinate (Ni)<br>Fe(C <sub>8</sub> NO <sub>2</sub> ) <sub>2</sub> [Ni(CN) <sub>4</sub> ]      | ENicotinate | Pmn2 <sub>1</sub> | a=7.3773 Å<br>b=6.8461 Å<br>c=23.4674 Å                 | V=1185.24 Å <sup>3</sup> | 2251859      |
| 1-Vinyl-1,2,4-triazole (Ni)<br>Fe(C <sub>4</sub> N <sub>3</sub> ) <sub>2</sub> [Ni(CN) <sub>4</sub> ] | VTzole      | Pnma              | a=13.2282 Å<br>b=7.2625 Å<br>c=16.9247 Å                | V=1625.96 Å <sup>3</sup> | 2251860      |

\*) Numbers for the CIF files deposited in the CCDC database.

Table S6. Distortion indexes  $\Sigma$ ,  $\Theta$ , and CShM for the iron atom coordination environment in the  $\text{Fe(L)}_2[\text{Ni(CN)}_4]$  solids formed using different organic molecules (L) as axial ligands. Pillared solids with and without SCO were considered.

| M                            | SCO ? | $\Sigma$ | $\Theta$ | CShM   | Reference            |
|------------------------------|-------|----------|----------|--------|----------------------|
| 1-Vinyl-1,2,4-triazole (Ni)  | No    | 147.325  | 145.345  | 2.6292 | This work (Table S5) |
| 4-Iodopyridine (Ni)          | No    | 165.762  | 269.293  | 4.1787 | This work (Table S5) |
| 4-Ethynylpyridine (Ni)       | No    | 168.145  | 276.087  | 4.4131 | This work (Table S5) |
| 4-Hydroxypyridine (Ni)       | No    | 55.106   | 78.725   | 0.6698 | This work (Table S5) |
| 5-Ethynylpyrimidine (Ni)     | No    | 129.092  | 199.932  | 2.8544 | This work (Table S5) |
| Ethyl Nicotinate (Ni)        | No    | 168.45   | 294.406  | 5.5558 | This work (Table S5) |
| 4-Phenylpyridine (Pt)        | Yes   | 9.804    | 18.966   | 0.0354 | [c]                  |
| 4,4-Bipyridine (Ni)          | Yes   | 16.529   | 19.812   | 0.0629 | [d]                  |
| Pyrazine (Pt)                | Yes   | 0        | 25.000   | 0.0496 | [e]                  |
| 2-Ethylimidazole (Ni)        | No    | 70.268   | 95.731   | 0.6690 | [f]                  |
| 2-Methylimidazole (Ni)       | No    | 22.724   | 67.506   | 0.1248 |                      |
| Benzimidazole (Ni)           | No    | 46.506   | 80.741   | 0.6528 |                      |
| 2-Imidazole (Ni)             | No    | 50.288   | 60.554   | 0.2754 | [g]                  |
| Thiazole (Ni)                | No    | 30.556   | 44.088   | 0.1280 | [h]                  |
| 3-Aminopyridine (Ni)         | Yes   | 13.82    | 19.396   | 0.0313 | [i]                  |
| 3-Methylpyridine (Ni)        | Yes   | 0.076    | 34.556   | 0.091  | [j]                  |
| 4-Methylpyridine (Ni)        | No    | 69.280   | 53.924   | 0.256  |                      |
| 2,4 Bipyridine (Pt)          | Yes   | 16.529   | 19.812   | 0.0629 | [k]                  |
| bis(4-pyridyl)acetylene (Ni) | Yes   | 0        | 16.608   | 0.0219 | [l]                  |

CShM: continuous shape measure was calculated using CoSyM-Continuous Symmetry Measures <https://csm.ouproj.org.il/>; References [c]: Spectroscopic, Structural, and Magnetic Studies. Inorganic chemistry, 48(13), 6130-6141; [d]: Magnetochemistry, 2(1), 8; [e]: Journal of the American Chemical Society, 130(28), 9019-9024; [f]: Journal of Solid State Chemistry, 204, 128-135; [g]: Journal of Solid State Chemistry, 197, 317-322; [h]: Polyhedron, 95, 75-80; [i]: Inorganic Chemistry, 54(17), 8711-8716; [j]: Molecular Crystals and Liquid Crystals Science and Technology. Section A. Molecular Crystals and Liquid Crystals, 341(2), 527-532; [k]: Inorganic Chemistry, 60(16), 11866-11877; [l]: Chemistry—A European Journal, 18(2), 507-516.



Table S7. Relevant interatomic distances (in Å), and calculated distortion indexes  $\Sigma$ ,  $\Theta$ , and CShM for the iron atom coordination polyhedron in the high spin phases in the  $\text{Fe}(\text{3XPy})_2[\text{M}(\text{CN})_4]$  series with X = F, Cl, Br, and I.

| X            | Phase           | SCO ? | Fe–N <sub>Py</sub> | Fe–N <sub>CN</sub> | $\Sigma$ | $\Theta$ | CShM   | Ref. |
|--------------|-----------------|-------|--------------------|--------------------|----------|----------|--------|------|
| <b>Py</b>    | HS (295 K), XRD | Yes   | 2.28(95)           | 2.13(63)           | 16.80    | 37.26    | 0.1305 | [a]  |
| <b>3FPy</b>  | HS (295 K), XRD | Yes   | 2.00(47)           | 2.09(18)           | 32.89    | 45.40    | 0.1985 | [a]  |
| <b>3ClPy</b> | HS (295 K), XRD | Yes   | 2.18(11)           | 2.09(24)           | 17.27    | 29.26    | 0.1094 | [a]  |
| <b>3BrPy</b> | HS (295 K), XRD | No    | 2.23(11)           | 2.12(53)           | 37.23    | 53.69    | 0.2357 | [a]  |
| <b>3I</b>    | HS (295 K), XRD | No    | 2.08(80)           | 2.15(65)           | 54.90    | 73.42    | 0.35   | [a]  |

CShM: continuous shape measure was calculated using CoSyM-Continuous Symmetry Measures <https://csm.ouproj.org.il/>; Reference [a]: J. Solid State Chem., 2020, 282, 121070

Table S8. Relevant interatomic distances (in Å), and distortion indexes  $\Sigma$ ,  $\Theta$ , and CShM for the for the iron atom coordination polyhedron in  $\text{Fe}(\text{3EPy})_2[\text{M}(\text{CN})_4]$  series with M=Ni, Pd and Pt; (3EPy = 3Ethynylpyridine)

| M         | Phase           | SCO ? | Fe–N <sub>Py</sub> | Fe–N <sub>CN</sub> | $\Sigma$ | $\Theta$ | CShM   | Ref. |
|-----------|-----------------|-------|--------------------|--------------------|----------|----------|--------|------|
| <b>Ni</b> | HS (295 K), XRD | Yes   | 2.25(14)           | 2.31 (6)           | 26.35    | 51.95    | 0.3453 | [b]  |
|           | LS calculated   |       | 2.00(1186)         | 1.99(404)          | 22.71    | 44.59    | 0.1816 |      |
| <b>Pd</b> | HS (295 K), XRD | Yes   | 2.20(7)            | 2.21(6)            | 59.68    | 109.78   | 0.9893 | [b]  |
|           | LS calculated   |       | 2.00(1148)         | 2.02(388)          | 45.35    | 75.49    | 0.4283 |      |
| <b>Pt</b> | HS (295 K), XRD | Yes   | 2.20(13)           | 2.18(15)           | 46.25    | 90.33    | 0.7527 | [b]  |
|           | LS calculated   |       | 1.99(1164)         | 1.96(518)          | 26.98    | 56.14    | 0.2517 |      |

CShM: continuous shape measure was calculated using CoSyM-Continuous Symmetry Measures <https://csm.ouproj.org.il/>; Reference [b]: *New J. Chem.* 2022, 46, 9618-9628

Table S9. Calculated electron density at the N-pyridinic atom, according to NBO, for different pyridine derivatives as pillar molecules. The NBO analysis was applied in the structures previously optimized (relaxed) according to the method described in the computational methods section.

| Ligand                           | Electron density at the pyridinic N atom | SCO ? | Reference |
|----------------------------------|------------------------------------------|-------|-----------|
| 1,2-di(4-Pyridyl)ethylene        | -0.511                                   | Yes   | This work |
| 1,4-bis(4-pyridylethynyl)benzene | -0.48                                    | Yes   | "         |
| 2-Methylpyridine                 | -0.5                                     | Yes   | "         |
| 3-Methylpyridine                 | -0.508                                   | Yes   | "         |
| 3-Fluoropyrazine                 | -0.51                                    | Yes   | "         |
| 3-Fluoropyridine                 | -0.493                                   | Yes   | "         |
| 3-Chloropyridine                 | -0.495                                   | Yes   | "         |
| 3-Bromopyridine                  | -0.523                                   | Yes   | "         |
| 3-Iodopyridine                   | -0.532                                   | Yes   | "         |
| 3-Ethynylpyridine                | -0.473                                   | Yes   | "         |
| 3-Hydroxypyridine                | -0.504                                   | Yes   | "         |
| 3-Aminopyridine                  | -0.515                                   | Yes   | "         |
| 4-Fluoropyridine                 | -0.51                                    | Yes   | "         |
| 4-Chloropyridine                 | -0.507                                   | Yes   | "         |
| 4-Bromopyridine                  | -0.526                                   | Yes   | "         |
| 4-Iodopyridine                   | -0.529                                   | Yes   | "         |
| 4,4-Bipyridine                   | -0.507                                   | Yes   | "         |
| 4,4-Azopyridine                  | -0.496                                   | Yes   | "         |
| Imidazol[1,2-a]Pyridine          | -0.586                                   | No    | "         |
| Pyrazine                         | -0.452                                   | Yes   | "         |
| Pyridine                         | -0.481                                   | Yes   | "         |
| 2-Ethynylpyridine                | -0.479                                   | No    | "         |
| 4-(2-Pyridin-4-ylethyl)Pyridine  | -0.577                                   | No    | "         |
| 4-Acetylpyridine                 | -0.486                                   | No    | "         |
| 4-Methylpyridine                 | -0.521                                   | No    | "         |
| 4-Pyridine Carboxyaldehyde       | -0.463                                   | No    | "         |
| 4-Vynylpyridine                  | -0.514                                   | No    | "         |
| Nicotinamide                     | -0.516                                   | No    | "         |
| Nicotinic acid                   | -0.52                                    | No    | "         |

Table S10. Calculated electron density at the N-pyridinic atom, according to NBO, for thiazole, oxazole, and imidazole and its derivatives. The NBO analysis was applied in the structures previously optimized (relaxed) according to the method described in the computational methods section.

| Ligand             | Electron density at the pyridinic N atom | SCO ? | Reference |
|--------------------|------------------------------------------|-------|-----------|
| Imidazole          | -0.560                                   | No    | This work |
| 2-methyl imidazole | -0.563                                   | No    | "         |
| 2-ethyl imidazole  | -0.562                                   | No    | "         |
| Benzimidazole      | -0.556                                   | No    | "         |
| Thiazole           | -0.512                                   | No    | "         |
| Oxazole            | -0.598                                   | No    | "         |

Table S11. Values of N<sub>1s</sub> core-level binding energy (BE) of the pyridinic N atom, from XPS measurements, for the Fe(L)<sub>2</sub>[Ni(CN)<sub>4</sub>] solids obtained with different organic molecules as axial ligands (L). Pillared solids with and without SCO were considered.

| With SCO                   |            |        |
|----------------------------|------------|--------|
| Ligand and inner metal (M) | N1s, in eV |        |
|                            | CN         | C-N=C  |
| 3-Hydroxypyridine (Ni)     | 398.58     | 399.43 |
| 3-Hydroxypyridine (Pd)     | 398.63     | 399.39 |
| 3-Hydroxypyridine (Pt)     | 398.64     | 399.38 |
| 3-Fluoropyridine (Ni)      | 398.6      | 399.76 |
| 3-Ethynylpyridine (Pd)     | 398.6      | 399.52 |
| 3-Ethynylpyridine (Pt)     | 398.53     | 399.57 |
| 3-Aminopyridine (Ni)       | 398.59     | 399.35 |
| 3-Methylpyridine (Ni)      | 398.52     | 399.4  |
| 4,4-Bipyridine (Ni)        | 398.15     | 399.03 |
| 4-Phenylpyridine (Ni)      | 398.49     | 399.35 |
|                            |            |        |
| Without SCO                |            |        |
| Ligand and inner metal (M) | N1s, in eV |        |
|                            | CN         | C-N=C  |
| 2-Pyridineethanol (Ni)     | 398.46     | 399.3  |
| 2-Vinyl pyrazine (Ni)      | 398.41     | 399.66 |
| 3-Bromopyridine (Ni)       | 398.49     | 399.59 |
| 3-Iodopyridine (Ni)        | 398.5      | 399.59 |
| 4-Ethylpyridine (Ni)       | 398.44     | 399.35 |

|                          |        |        |
|--------------------------|--------|--------|
| 4-ChloroPyridine (Ni)    | 398.5  | 399.47 |
| 4-Iodopyridine (Ni)      | 398.51 | 399.49 |
| 4-Hydroxypyridine (Ni)   | 398.55 | 400.07 |
| 5-Ethynilpyrimidine (Ni) | 398.55 | 399.72 |
| nicotinic Acid (Ni)      | 398.37 | 400.08 |
| Imidazole (Ni)           | 398.62 | 400.46 |
| 2-methyl imidazole (Ni)  | 398.66 | 400.39 |
| 2-ethyl imidazole (Ni)   | 398.68 | 400.37 |
| Benzimidazole (Ni)       | 398.96 | 400.78 |
| Thiazole (Ni)            | 398.49 | 399.39 |

Source of the data reported in this Table: This work

Table S12. Frequency, in  $\text{cm}^{-1}$ , of the  $\nu(\text{CN})$  band values from IR spectra for the  $\text{Fe}(\text{L})_2[\text{Ni}(\text{CN})_4]$  solids formed using different organic molecules (L) as axial ligands. Pillared solids with and without SCO were considered.

| With SCO                     |                  | Without SCO                 |                  |
|------------------------------|------------------|-----------------------------|------------------|
| Ligand and inner metal (M)   | $\nu(\text{CN})$ | Ligand and inner metal (M)  | $\nu(\text{CN})$ |
| 3-Fluoropyridine (Ni)        | 2161             | 1-Vinyl-1,2,4-triazole (Ni) | 2147             |
| 3-Chloropyridine (Ni)        | 2156             | 2-Vinyl pyrazine (Ni)       | 2146             |
| 3-Methylpyridine (Ni)        | 2155             | 3-Bromopyridine (Ni)        | 2149             |
| 3-Ethynylpyridine (Ni)       | 2155             | 3-Iodopyridine (Ni)         | 2150             |
| 3-Hidroxyppyridine (Ni)      | 2159             | 4-Chloropyridine (Ni)       | 2148             |
| 3-Aminopyridine (Ni)         | 2155             | 4-Bromopyridine (Ni)        | 2150             |
| 4,4-Bipyridine (Ni)          | 2151             | 4-Iodopyridine (Ni)         | 2150             |
| 4-Phenylpyridine (Ni)        | 2152             | 4-Ethylpyridine (Ni)        | 2148             |
| bis(4-pyridyl)butadiyne (Ni) | 2154             | Ethyl Nicotinate (Ni)       | 2149             |
| Ethane (Ni)                  | 2151             | Methyl Nicotinate (Ni)      | 2150             |
| Ethylene (Ni)                | 2160             | Nicotinamide (Ni)           | 2149             |
| Pyrazine (Ni)                | 2153             | Nicotinic Acid (Ni)         | 2146             |
| Pyridine (Ni)                | 2158             | Imidazo[1,2-A]pyridine (Ni) | 2149             |
| Pyridazine (Ni)              | 2159             | Imidazo[1,2-A]pyrazine (Ni) | 2150             |

Source of the data reported in this Table: This work

Table S13. Frequency, in  $\text{cm}^{-1}$ , obtained for the  $\text{Fe-N}_L$ , from the calculated Raman spectra, for the  $\text{Fe(L)}_2[\text{Ni(CN)}_4]$  solids formed using different organic molecules (L) as axial ligands. Pillared solids with and without SCO were considered.

| <b>With SCO</b>              |                                        | <b>Without SCO</b>               |                                        |
|------------------------------|----------------------------------------|----------------------------------|----------------------------------------|
|                              | <b><math>\nu(\text{Fe-N}_L)</math></b> |                                  | <b><math>\nu(\text{Fe-N}_L)</math></b> |
| Pyridine (Ni)                | 240                                    | 1-Vinyl-1,2,4-triazole (Ni)      | 286                                    |
| 2-Chloropyrazine (Ni)        | 289                                    | 2-PyridineEthanol (Ni)           | 275                                    |
| 3-Fluoropyridine (Ni)        | 284                                    | 3-Bromopyridine (Ni)             | 265                                    |
| 3-Chloropyridine (Ni)        | 274                                    | 3-(2-Hydroxyethyl) pyridine (Ni) | 278                                    |
| 3-Methylpyridine (Ni)        | 281                                    | 4-Methylpyridine (Ni)            | 270                                    |
| 3-Hydroxypyridine (Ni)       | 283                                    | 4-Ethylpyridine (Ni)             | 263                                    |
| 3-Ethynylpyridine (Ni)       | 282                                    | 4-Hydroxypyridine (Ni)           | 272                                    |
| 3-Aminopyridine (Ni)         | 284                                    | 5-Ethynylpyridine (Ni)           | 275                                    |
| 4,4-Bipyridine (Ni)          | 290                                    | Methyl Nicotinate (Ni)           | 274                                    |
| bis(4-pyridyl)butadiyne (Ni) | 301                                    | Ethyl Nicotinate (Ni)            | 271                                    |
| 4-Benzylpyridine (Ni)        | 242                                    | Nicotinamide (Ni)                | 274                                    |
| Pyrazine (Ni)                | 301                                    | Nicotinic Acid (Ni)              | 276                                    |
| Pyridazine (Ni)              | 306                                    |                                  |                                        |

Source of the data reported in this Table: This work

Table S14. Mössbauer parameter  $\Delta_{QS}$ , at room temperature, for a group of ferrous tetracyanometallates with and without spin crossover.

| Label, in Fig.10D | Material                           | SCO? | $\Delta_{QS}$ , mm/s | Reference                                                                                                                                                              |
|-------------------|------------------------------------|------|----------------------|------------------------------------------------------------------------------------------------------------------------------------------------------------------------|
| 1                 | FePyNPTCN                          | Yes  | 0.86                 | T. Kitazawa, K. Hosoya, M. Takahashi, M. Takeda, I. Marchuk, S. M. Filipek, <i>J. Radioanal. Nucl. Chem.</i> , 2003, 255, 509-512.                                     |
| 2                 | Fe3CIPyTCN                         | Yes  | 1.3                  | T. Kitazawa, M. Takahashi, M. Takahashi, M. Enomoto, A. Miyazaki, T. Enoki, M. Takeda, <i>J. Radioanal. Nucl. Chem.</i> , 1999, 239, 285-290.                          |
| 3                 | FeAzpyNi                           | Yes  | 1.16                 | I. Boldog, A. G. Gaspar, V. Martínez, P. Pardo-Ibañez, V. Ksenofontov, A. Bhattacharjee, ....., J. A. Real. <i>Angew. Chemie</i> , 2008, 120, 6533-6537.               |
| 4                 | FeAzpyPt                           | Yes  | 0.85                 |                                                                                                                                                                        |
| 5                 | FeAzpyPd                           | Yes  | 0.83                 |                                                                                                                                                                        |
| 6                 | FeAzpyPt•H <sub>2</sub> O          | Yes  | 0.86                 |                                                                                                                                                                        |
| 7                 | FeAzpyPd•nH <sub>2</sub> O         | Yes  | 0.89                 |                                                                                                                                                                        |
| 8                 | FeNH <sub>2</sub> PyNi             | Yes  | 0.92                 | W. Liu, L. Wang, Y. J. Su, Y. C. Chen, J. Tucek, R. Zboril, ... & M. L. Tong. <i>Inorg. Chem.</i> , 2015, 54, 8711-8716.                                               |
| 9                 | FeNH <sub>2</sub> PyPt             | Yes  | 0.74                 |                                                                                                                                                                        |
| 10                | FebpacPt•H <sub>2</sub> O•0.71bpac | Yes  | 0.82                 | C. Bartual-Murgui, L. Salmon, A. Akou, N. A. Ortega-Villar, H. J. Shepherd, M. C. Muñoz, A. Bousseksou, <i>Chem.–A Europ. J.</i> , 2012, 18, 507-516.                  |
| 11                | Fe3OHPyNi                          | Yes  | 1.33                 | This work                                                                                                                                                              |
| 12                | Fe3OHPyPd                          | Yes  | 1.31                 |                                                                                                                                                                        |
| 13                | Fe3OHPyPt                          | Yes  | 1.31                 |                                                                                                                                                                        |
| 14                | Fe3CIPyTCN                         | No   | 2.68                 |                                                                                                                                                                        |
| 15                | FePyzPtH•H <sub>2</sub> O          | No   | 2.86                 | G. Agusti, S. Cobo, A. B. Gaspar, G. Molnar, N. O. Moussa, P. A. Szilagyi, P. A., ...A. Bousseksou, A. <i>Chem. Mater.</i> , 2008, 20, 6721-6732.                      |
| 16                | FePyzPt•2.5H <sub>2</sub> O        | No   | 2.77                 |                                                                                                                                                                        |
| 17                | FeAzpyPd•nH <sub>2</sub> O         | No   | 2.93                 |                                                                                                                                                                        |
| 18                | FeAzpyPt•nH <sub>2</sub> O         | No   | 2.9                  |                                                                                                                                                                        |
| 19                | FeAzpyPd                           | No   | 2.3                  |                                                                                                                                                                        |
| 20                | FebpacPt•H <sub>2</sub> O•0.09bpac | No   | 2.75                 | C. Bartual-Murgui, L. Salmon, A. Akou, N. A. Ortega-Villar, H. J. Shepherd, M. C. Muñoz, ... & A. Bousseksou, <i>Chemistry–A European Journal</i> , 2012, 18, 507-516. |

**CCDC Numbers for the six additional crystal structures solved and refined for Hofmann-like coordination polymers without SCO used to calculate the distortion indexes for the iron coordination polyhedron.**

Deposition Number 2251855  
Compound Name: 4-Ethynylpyridine  
Data Block Name: data\_Fe(4-Ethynylpyridine)<sub>2</sub>[Ni(CN)<sub>4</sub>]  
Unit Cell Parameters: a 18.3802(2) b 7.4667(2) c 6.8675(3) I2/m

-----

Deposition Number 2251856  
Compound Name: 4-Iodopyridine  
Data Block Name: data\_Fe(4-Iodopyridine)<sub>2</sub>[Ni(CN)<sub>4</sub>]  
Unit Cell Parameters: a 18.3630(2) b 7.4646(2) c 6.7483(3) I2/m

-----

Deposition Number 2251857  
Compound Name: 4-Hydroxypyridine  
Data Block Name: data\_Fe(4-Hydroxypyridine)<sub>2</sub>[Ni(CN)<sub>4</sub>]  
Unit Cell Parameters: a 10.3432(2) b 10.2877(2) c 7.7411(3) P21

-----

Deposition Number 2251858  
Compound Name: 5-Ethynylpyrimidine  
Data Block Name: data\_Fe(5-Ethynylpyrimidine)<sub>2</sub>[Ni(CN)<sub>4</sub>]  
Unit Cell Parameters: a 16.3432(2) b 6.9451(2) c 7.6366(3) P21

-----

Deposition Number 2251859  
Compound Name: Ethyl-Nicotinate  
Data Block Name: data\_Fe(Ethyl-Nicotinate)<sub>2</sub>[Ni(CN)<sub>4</sub>]  
Unit Cell Parameters: a 7.3773(2) b 6.8461(3) c 23.4674(2) Pmn21

-----

Deposition Number 2251860  
Compound Name: Vinyl-triazole  
Data Block Name: data\_Fe(Vinyl-triazole)<sub>2</sub>[Ni(CN)<sub>4</sub>]  
Unit Cell Parameters: a 13.2282(3) b 7.2625(2) c 16.9247(3) Pnma
